# Supplementary material for: Detecting coevolution without phylogenetic trees? Tree-ignorant metrics of coevolution perform as well as tree-aware metrics
Source: PubMed Central journal article supplement (PMC2637866; doi:10.1186/1471-2148-8-327), 2008-12-03
Supplement: 1471-2148-8-327-S2.pdf [file 1471-2148-8-327-S2.pdf]

**Additional Table 2: Top five amino acid alphabets for each method on myoglobin and myosin rod alignments.**

| (A) Tetrapod Myoglobin |              |              |          |              |              |           |                |        |  |
|------------------------|--------------|--------------|----------|--------------|--------------|-----------|----------------|--------|--|
| Rank                   | MI           | NMI          | RMI      | SCA8         | MIP          | GCTMPCA7  | AS             |        |  |
| 1                      | CHARGE_HIS_2 | A1_4         | A3_2     | CHARGE_HIS_2 | CHARGE_2     | A4_7      | CHARGE_HIS_3   |        |  |
| 2                      | CHARGE_2     | A1_3         | A3_4     | CHARGE_HIS_3 | CHARGE_HIS_2 | A1_10     | CHARGE_2       |        |  |
| 3                      | CHARGE_HIS_3 | A1_7         | A4_4     | A1_7         | CHARGE_3     | A4_10     | CHARGE_3       |        |  |
| 4                      | A1_4         | CHARGE_HIS_2 | A5_10    | A1_4         | CHARGE_HIS_3 | A5_5      | CHARGE_HIS_2   |        |  |
| 5                      | CHARGE_3     | CHARGE_2     | A4_7     | A1_2         | A4_4         | A5_10     | POLARITY_HIS_4 |        |  |
| (B) Chordate Myosin    |              |              |          |              |              |           |                |        |  |
| Rank                   | MI           | NMI          | RMI      | SCA6         | MIP          | LnLCorr99 | AS             | CoMap  |  |
| 1                      | CHARGE_3     | CHARGE_3     | A4_3     | CHARGE_3     | A5_9         | DEF99     | A1_2           | ORIG   |  |
| 2                      | CHARGE_2     | CHARGE_2     | A4_4     | CHARGE_HIS_3 | A2_9         | A4        | A5_5           | A4     |  |
| 3                      | CHARGE_HIS_3 | CHARGE_HIS_3 | A3_3     | CHARGE_2     | A5_10        | A5        | CHARGE_3       | VOLUME |  |
| 4                      | CHARGE_HIS_2 | CHARGE_HIS_2 | A3_4     | CHARGE_HIS_2 | ORIG         | A2        | A2_5           | A2     |  |
| 5                      | A3_9         | A4_4         | CHARGE_2 | SIZE_2       | A3_9         | A1        | A5_9           | A1     |  |

For each method and alignment combination, the top five ranking alphabets are presented. Rankings are determined based on the p-value at ( $i, i + 4$ ) in the given alignment. Methods that did not achieve any significant p-values (at  $\alpha = 0.01$ ) for the given alignment are not included as those rankings are not meaningful.
