# Supplementary material for: Detecting coevolution without phylogenetic trees? Tree-ignorant metrics of coevolution perform as well as tree-aware metrics
Source: PubMed Central journal article supplement (PMC2637866; doi:10.1186/1471-2148-8-327), 2008-12-03
Supplement: 1471-2148-8-327-S3.pdf [file 1471-2148-8-327-S3.pdf]

**Additional Table 3: The effect of increased false positive rate on t-test p-values.**

| Alignment, Alphabet              | p-value with (m,n) additional 1.0 scores in the $(i, i+4)$ and background distributions, respectively |                       |                       |                       |                      |                       |
|----------------------------------|-------------------------------------------------------------------------------------------------------|-----------------------|-----------------------|-----------------------|----------------------|-----------------------|
| Tetrapod Myoglobin, charge_his.2 | (0,0)                                                                                                 | (1,82)                | (10,820)              | (20,1640)             | (50,4100)            | (100,8200)            |
|                                  | $5.6 \times 10^{-5}$                                                                                  | $0.5 \times 10^{-2}$  | $2.6 \times 10^{-1}$  | $3.0 \times 10^{-1}$  | $3.5 \times 10^{-1}$ | $3.6 \times 10^{-1}$  |
| Chordate Myosin, orig            | (0,0)                                                                                                 | (1,539)               | (10,5390)             | (20,10780)            | (50,26950)           | (100,53900)           |
|                                  | $1.67 \times 10^{-6}$                                                                                 | $3.35 \times 10^{-6}$ | $1.47 \times 10^{-4}$ | $1.05 \times 10^{-3}$ | $1.0 \times 10^{-2}$ | $3.87 \times 10^{-2}$ |

To illustrate that methods with increased false positive rates achieve less significant p-values in the t-test-based analysis, for top performing method/alphabet combinations  $(i, i+4)$  score distributions are compared against background distributions, where both distributions have been modified to include additional high (i.e., positive) scores. False positives are added to both the coevolving and non-coevolving distributions, at the same rate. For example, when 1 false positive is added to the myoglobin  $(i, i+4)$ , 82 false positives are added to the background distribution because the background distribution contains 82 times more values than the  $(i, i+4)$  distribution. The additional high scores are analogous to extreme false positives (since the max value of 1.0 for NMI was added).
